# Supplementary material for: The COSMAM TRIAL a prospective cohort study of quality of life and cosmetic outcome in patients undergoing breast conserving surgery
Source: Springer Nature journal article supplement (doi:10.1186/s12885-018-4368-8), 2018-04-23
Supplement: MOESM4 [file 15713914]

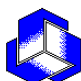

## EORTC QLQ - BR23

Patients sometimes report that they have the following symptoms or problems. Please indicate the extent to which you have experienced these symptoms or problems during the past week.

### **During the past week:**

|                                                                                                     | <b>Not at<br/>All</b> | <b>A<br/>Little</b> | <b>Quite<br/>a Bit</b> | <b>Very<br/>Much</b> |
|-----------------------------------------------------------------------------------------------------|-----------------------|---------------------|------------------------|----------------------|
| 31. Did you have a dry mouth?                                                                       | 1                     | 2                   | 3                      | 4                    |
| 32. Did food and drink taste different than usual?                                                  | 1                     | 2                   | 3                      | 4                    |
| 33. Were your eyes painful, irritated or watery?                                                    | 1                     | 2                   | 3                      | 4                    |
| 34. Have you lost any hair?                                                                         | 1                     | 2                   | 3                      | 4                    |
| 35. Answer this question only if you had any hair loss:<br>Were you upset by the loss of your hair? | 1                     | 2                   | 3                      | 4                    |
| 36. Did you feel ill or unwell?                                                                     | 1                     | 2                   | 3                      | 4                    |
| 37. Did you have hot flushes?                                                                       | 1                     | 2                   | 3                      | 4                    |
| 38. Did you have headaches?                                                                         | 1                     | 2                   | 3                      | 4                    |
| 39. Have you felt physically less attractive<br>as a result of your disease or treatment?           | 1                     | 2                   | 3                      | 4                    |
| 40. Have you been feeling less feminine as a<br>result of your disease or treatment?                | 1                     | 2                   | 3                      | 4                    |
| 41. Did you find it difficult to look at yourself naked?                                            | 1                     | 2                   | 3                      | 4                    |
| 42. Have you been dissatisfied with your body?                                                      | 1                     | 2                   | 3                      | 4                    |
| 43. Were you worried about your health in the future?                                               | 1                     | 2                   | 3                      | 4                    |

### **During the past four weeks:**

|                                                                                                              | <b>Not at<br/>All</b> | <b>A<br/>Little</b> | <b>Quite<br/>a Bit</b> | <b>Very<br/>Much</b> |
|--------------------------------------------------------------------------------------------------------------|-----------------------|---------------------|------------------------|----------------------|
| 44. To what extent were you interested in sex?                                                               | 1                     | 2                   | 3                      | 4                    |
| 45. To what extent were you sexually active?<br>(with or without intercourse)                                | 1                     | 2                   | 3                      | 4                    |
| 46. Answer this question only if you have been sexually<br>active: To what extent was sex enjoyable for you? | 1                     | 2                   | 3                      | 4                    |

Please go on to the next page

**During the past week:**

|                                                                                                     | <b>Not at<br/>All</b> | <b>A<br/>Little</b> | <b>Quite<br/>a Bit</b> | <b>Very<br/>Much</b> |
|-----------------------------------------------------------------------------------------------------|-----------------------|---------------------|------------------------|----------------------|
| 47. Did you have any pain in your arm or shoulder?                                                  | 1                     | 2                   | 3                      | 4                    |
| 48. Did you have a swollen arm or hand?                                                             | 1                     | 2                   | 3                      | 4                    |
| 49. Was it difficult to raise your arm or to move it sideways?                                      | 1                     | 2                   | 3                      | 4                    |
| 50. Have you had any pain in the area of your affected breast?                                      | 1                     | 2                   | 3                      | 4                    |
| 51. Was the area of your affected breast swollen?                                                   | 1                     | 2                   | 3                      | 4                    |
| 52. Was the area of your affected breast oversensitive?                                             | 1                     | 2                   | 3                      | 4                    |
| 53. Have you had skin problems on or in the area of your affected breast (e.g., itchy, dry, flaky)? | 1                     | 2                   | 3                      | 4                    |

SPECIMEN
